# Supplementary material for: Density functional theory simulation of cobalt oxide aggregation and facile synthesis of a cobalt oxide, gold and multiwalled carbon nanotube based ternary composite for a high performance supercapattery
Source: Royal Society of Chemistry journal article supplement (doi:10.1039/c9nj02473e), 2019-01-01
Supplement: c9nj02473e1.pdf [file c9nj02473e1.pdf]

# Density Functional Theory Simulation of Cobalt Oxide Aggregation and Facile Synthesis of Cobalt oxide, Gold and Multiwalled Carbon Nanotubes based Ternary Composite for a High Performance Supercapattery

Javed Iqbal<sup>1,2</sup>, Lijie Li<sup>3</sup>, Arshid Numan<sup>4,5#</sup>, Saqib Rafique<sup>3</sup>, Rashida Jafer<sup>6</sup>, Sharifah Mohamad<sup>1</sup>, Mohammad Khalid<sup>5</sup>, K. Ramesh<sup>7</sup>, S. Ramesh<sup>7\*</sup>

<sup>1</sup>*Department of Chemistry, Faculty of Science, University of Malaya, Kuala Lumpur 50603, Malaysia.*

<sup>2</sup>*Center of Nanotechnology, King Abdulaziz University, Jeddah 21589, Saudi Arabia.*

<sup>3</sup>*Multidisciplinary Nanotechnology Centre, College of Engineering, Swansea University, Swansea SA1 8EN, United Kingdom.*

<sup>4</sup>*State Key Laboratory of ASIC and System, SIST, Fudan University, 200433, Shanghai, China*

<sup>5</sup>*Graphene & Advanced 2D Materials Research Group (GAMRG), School of Science and Technology, Sunway University, No. 5, Jalan Universiti, Bandar Sunway, 47500 Subang Jaya, Selangor, Malaysia.*

<sup>6</sup>*Department of Physics, Faculty of Science, King Abdulaziz University, Jeddah 21589, Saudi Arabia.*

<sup>7</sup>*Center for Ionics University of Malaya, Department of Physics, Faculty of Science, University of Malaya, Kuala Lumpur 50603, Malaysia.*

\*Corresponding authors

\* E-mail: [rameshtsubra@gmail.com](mailto:rameshtsubra@gmail.com),

# [numan.arshed@gmail.com](mailto:numan.arshed@gmail.com)

Tel: +603-7967 4391, Fax: +603-7967 4146

Raman spectroscopy is the most commonly used non-destructive technique to analyze the quality and structure of the carbon-based materials.<sup>1</sup> **Figure S1 (a and b)** presents the Raman spectra of MWCNTs and Co<sub>3</sub>O<sub>4</sub>/Au@MWCNTs composite, respectively. In **Figure**

**S1(a and b)**, two sharp peaks at 1356 (1350  $\text{cm}^{-1}$  in case of composite) and 1592 (1585  $\text{cm}^{-1}$  in case of composite)  $\text{cm}^{-1}$  presents the typical defect bands (D) and attributed to the presence of disorder in carbon systems (disorder induced by defects and curvature in the nanotube lattice)<sup>2</sup> and G (graphite)-band owing to the in-plane vibration of the C–C bond (G band), respectively.<sup>3-5</sup> Also, an overtone of the D band (2D band) is present at 2695  $\text{cm}^{-1}$  (2708  $\text{cm}^{-1}$  in case of composite), attributed to the two-phonon scattering.<sup>6</sup> However, the spectra in **Figure S1b** (and inset) shows significant differences as compared to the pristine MWCNTs and featured several peaks in the lower wavenumber region, mainly ascribed to the presence of  $\text{Co}_2\text{O}_3$  NPs in the  $\text{Co}_3\text{O}_4/\text{Au}@$ MWCNTs ternary composite. It should be noted that Raman does not detect the noble metals and therefore, Au traces cannot be seen in the spectra.<sup>7</sup> The peaks present at 479, 520, 622 and 686  $\text{cm}^{-1}$  are attributed to  $E_g$ ,  $F_{12g}^1$ ,  $F_{2g}^2$  and  $A_{1g}$  modes of modes of  $\text{Co}_3\text{O}_4$ , respectively.<sup>7-9</sup> Hence, the Raman spectra compliments the other results in the manuscript and shows the successful formation of  $\text{Co}_3\text{O}_4/\text{Au}@$ MWCNTs composite.

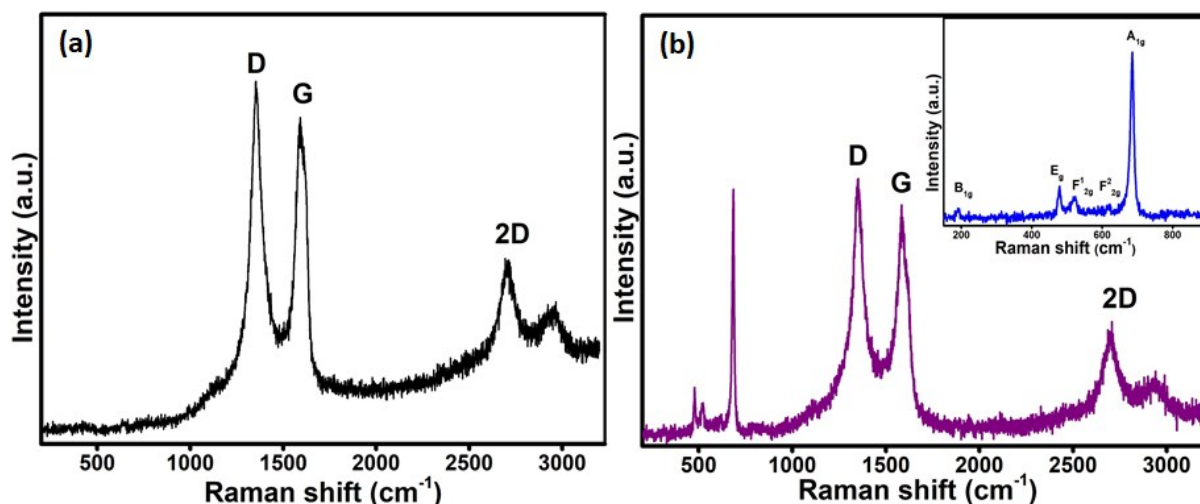

**Figure S1** Raman spectrum of (a) acid treated MWCNTs and (b)  $\text{Co}_3\text{O}_4/\text{Au}@$ MWCNTs nanocomposite.

## References

1. H. Murphy, P. Papakonstantinou and T. T. Okpalugo, *Journal of Vacuum Science & Technology B: Microelectronics and Nanometer Structures Processing, Measurement, and Phenomena*, 2006, **24**, 715-720.
2. H. Qi, J. Liu and E. Mäder, *Fibers*, 2014, **2**, 295-307.
3. M. Zdrojek, W. Gebicki, C. Jastrzebski, T. Melin and A. Huczko, 2004.
4. L. Bokobza and J. Zhang, *Express Polymer Letters*, 2012, **6**.
5. D. Baskaran, J. W. Mays and M. S. Bratcher, *Chemistry of Materials*, 2005, **17**, 3389-3397.
6. V. L. Kuznetsov, S. N. Bokova-Sirosh, S. I. Moseenkov, A. V. Ishchenko, D. V. Krasnikov, M. A. Kazakova, A. I. Romanenko, E. N. Tkachev and E. D. Obraztsova, *physica status solidi (b)*, 2014, **251**, 2444-2450.
7. M. M. Shahid, P. Rameshkumar, A. Pandikumar, H. N. Lim, Y. H. Ng and N. M. Huang, *Journal of Materials Chemistry A*, 2015, **3**, 14458-14468.
8. H. Kim, D.-H. Seo, S.-W. Kim, J. Kim and K. Kang, *Carbon*, 2011, **49**, 326-332.
9. H.-C. Liu and S.-K. Yen, *Journal of Power Sources*, 2007, **166**, 478-484.
